# Supplementary material
Source: Springer Nature journal article supplement (https://www.springermedizin.de/resource/supplementary/12936_2013_2936_MOESM21_ESM.pdf/9544554)

$R = 0.2$  $R = 0.9$ 

(1)

(2)

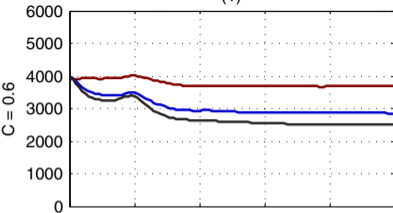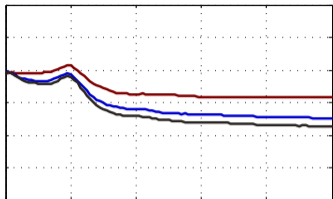

(3)

(4)

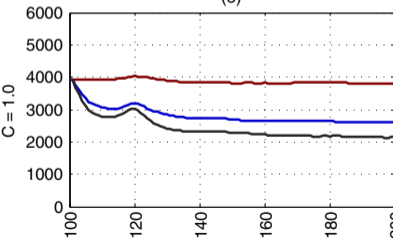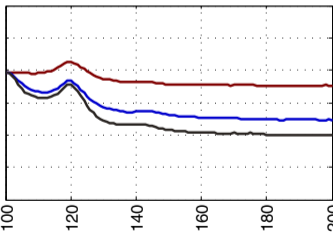

Time (Day)

—  $M = 0.0$  —  $M = 0.5$  —  $M = 1.0$

Supplement: MOESM21 [file 9544554]
